# Supplementary material for: Modeling the Seasonal Variation of Windborne Transmission of Porcine Reproductive and Respiratory Syndrome Virus between Swine Farms
Source: MDPI journal article supplement (doi:10.3390/v15081765), 2023-08-18
Supplement: s1 [file s1]

## SETUP.CFG file

The model implementation utilized the sample SETUP.CFG file. For a comprehensive understanding of the parameter's definition, please refer to the HYSPLIT user guide provided at the following link:

<https://www.ready.noaa.gov/hysplitusersguide/S410.htm>

```
&SETUP
ratio=0.75,
delt=0.0,
initd=0,
kpuff=0,
khmax=9999,
khinp=0,
numpar=2500,
maxpar=10000,
nbptyp=1,
qcycle=0.0,
efile="",
k10m=1,
kdef=0,
krand=2,
kzmix=0,
kbls=1,
kblt=0,
isot=-99,
idsp=1,
wvert=.FALSE.,
vscale=200.0,
vscales=5.0,
vscaleu=200.0,
hscale=10800.0,
capemin=-1.0,
tkemin=0.001000000,
uratio=5.873300076,
tvmix=1.00,
tkerd=0.18,
tkern=0.18,
kmix0=150,
kmixd=0,
ninit=1,
ndump=0,
ncycl=0,
pinbc='PARINBC',
pinpf='PARINIT',
poutf='PARDUMP',
messg='MESSAGE',
vdist='VMSDIST',
mgmin=10,
conage=24,
gemage=48,
kmsl=0,
kwet=1,
ichem=0,
cpack=1,
cmass=0,
kspl=1,
krnd=6,
frhmax=3.00,
```

```
splitf=1.00,  
frhs=1.00,  
frvs=0.01,  
frts=0.10,  
dx=1.00,  
dy=1.00,  
dz=0.01,  
/  

```
