# Supplementary material for: Modeling the Seasonal Variation of Windborne Transmission of Porcine Reproductive and Respiratory Syndrome Virus between Swine Farms
Source: MDPI journal article supplement (doi:10.3390/v15081765), 2023-08-18
Supplement: s1 [file s1]

## ASCDATA.CFG

The model implementation utilized the sample ASCDATA.CFG file. For a comprehensive understanding of the parameter's definition, please refer to the HYSPLIT user guide provided at the following link:

<https://www.ready.noaa.gov/hysplitusersguide/S444.htm>

```
-90.0 -180.0  
1.0 1.0  
180 360  
2  
0.2  
' '  
.'
```
