# Supplementary material for: Modeling the Seasonal Variation of Windborne Transmission of Porcine Reproductive and Respiratory Syndrome Virus between Swine Farms
Source: Viruses. 2023 Aug 18;15(8):1765. doi: 10.3390/v15081765 (PMC10459243; doi:10.3390/v15081765)
Supplement: Supplementary file 1 [file viruses-15-01765-s001.zip]

Archive with 4 entries (4 files):
- File S1 SETUP_file.pdf
- File S2 ASCDATA_file.pdf
- File S3 CONTROL_file.pdf
- Table_S1.pdf
